# Supplementary material
Source: PubMed Central journal article supplement (PMC6512157)
Supplement: ArseneaultSupplementalMaterial_rev.pdf [file ArseneaultSupplementalMaterial_rev.pdf]

Supplementary Table S1: Association between loneliness and perceived collective efficacy controlling individually for covariates

|                     | Association with loneliness ( $\beta$ ), controlling for: |                     |            |             |
|---------------------|-----------------------------------------------------------|---------------------|------------|-------------|
|                     | (Baseline)                                                | Living with co-twin | Depression | Neuroticism |
| Collective efficacy | -.18 ***                                                  | -.17 ***            | -.15 ***   | -.16 ***    |
| Covariate           | -                                                         | -.07 **             | .40 ***    | .26 ***     |

$\beta$  = standardised regression coefficient. All analyses adjusted for gender and socioeconomic status.

\*\*\*  $p < .001$  \*\*  $p < .01$

Supplementary Table S2: Association between loneliness and perceived neighbourhood disorder controlling for covariates

|                        | Association with loneliness ( $\beta$ ), controlling for: |                     |            |             |
|------------------------|-----------------------------------------------------------|---------------------|------------|-------------|
|                        | (Baseline)                                                | Living with co-twin | Depression | Neuroticism |
| Neighbourhood disorder | .16 ***                                                   | .16 ***             | .08 ***    | .14 ***     |
| Covariate              | -                                                         | -.08 **             | .39 ***    | .26 ***     |

$\beta$  = standardised regression coefficient. All analyses adjusted for gender and socioeconomic status.

\*\*\*  $p < .001$  \*\*  $p < .01$
